# Supplementary material
Source: PubMed Central journal article supplement (PMC6736448)
Supplement: kwz126_terry_web_material_final.pdf [file kwz126_terry_web_material_final.pdf]

## Early-Life Growth and Benign Breast Disease

Mandy Goldberg, Barbara A. Cohn, Lauren C. Houghton, Julie D. Flom, Ying Wei, Piera Cirillo, Karin B. Michels, and Mary Beth Terry

**Web Table 1.** Multivariable models of maternal pre-pregnancy BMI, gestational weight gain and benign breast disease diagnosis, Early Determinants of Mammographic Density (EDMD) Study, 1959-2008.

**Web Table 2.** Multivariable models of birth size and growth in infancy and early childhood and benign breast disease diagnosis, Early Determinants of Mammographic Density (EDMD) Study, 1959-2008.

**Web Figure 1.** Sensitivity analyses for the association between rapid weight gain and benign breast disease diagnosis, Early Determinants of Mammographic Density (EDMD) Study, 1959-2008.

**Web Figure 2.** Sensitivity analyses for the association between slow weight gain and benign breast disease diagnosis, Early Determinants of Mammographic Density (EDMD) Study, 1959-2008.

**Web Figure 3.** Distribution of body mass index at age 7 years by early-life weight pattern, Early Determinants of Mammographic Density (EDMD) Study. 1959-2008.

**Web Table 1. Multivariable models of maternal pre-pregnancy BMI, gestational weight gain and benign breast disease diagnosis, Early Determinants of Mammographic Density (EDMD) Study, 1959-2008.**

|                                                                                                | No. | Age and site adjusted |            | Multivariable-adjusted |            |
|------------------------------------------------------------------------------------------------|-----|-----------------------|------------|------------------------|------------|
|                                                                                                |     | OR                    | 95% CI     | OR                     | 95% CI     |
| Pre-pregnancy BMI <sup>a,b</sup>                                                               |     |                       |            |                        |            |
| < 18.5                                                                                         | 59  | 1.11                  | 0.56, 2.20 | 0.94                   | 0.45, 1.99 |
| 18.5 - <25.0                                                                                   | 739 | 1.00                  | Referent   | 1.00                   | Referent   |
| 25.0 - <30.0                                                                                   | 185 | 1.00                  | 0.65, 1.55 | 1.07                   | 0.69, 1.66 |
| ≥30.0                                                                                          | 64  | 0.50                  | 0.21, 1.19 | 0.51                   | 0.22, 1.23 |
| Gestational Weight Gain <sup>c</sup>                                                           |     |                       |            |                        |            |
| 5 kg or less                                                                                   | 122 | 0.63                  | 0.34, 1.15 | 0.69                   | 0.35, 1.37 |
| >5-10 kg                                                                                       | 534 | 1.00                  | Referent   | 1.00                   | Referent   |
| >10-15 kg                                                                                      | 368 | 1.08                  | 0.77, 1.53 | 1.10                   | 0.76, 1.58 |
| >15kg                                                                                          | 63  | 0.53                  | 0.23, 1.20 | 0.52                   | 0.22, 1.24 |
| Gestational Weight Gain and Maternal Pre-pregnancy BMI <sup>a</sup> , categorized <sup>d</sup> |     |                       |            |                        |            |
| Maternal pre-pregnancy BMI <sup>a</sup> < 25 and gestational weight gain ≤10 kg                | 460 | 1.00                  | 0.69, 1.46 | 1.02                   | 0.69, 1.51 |
| Maternal pre-pregnancy BMI <sup>a</sup> ≥ 25 and gestational weight gain ≤10 kg                | 159 | 0.74                  | 0.43, 1.26 | 0.80                   | 0.46, 1.40 |
| Maternal pre-pregnancy BMI <sup>a</sup> < 25 and gestational weight gain >10 kg                | 324 | 1.00                  | Referent   | 1.00                   | Referent   |
| Maternal pre-pregnancy BMI <sup>a</sup> ≥ 25 and gestational weight gain >10 kg                | 90  | 1.07                  | 0.60, 1.90 | 1.15                   | 0.64, 2.07 |

BMI: body mass index; CI: confidence interval; kg: kilograms; OR: odds ratio

<sup>a</sup>Weight(kg)/height(m)<sup>2</sup>

<sup>b</sup>Multivariable model includes site, age at interview, race, maternal cigarettes smoked per day, maternal height, maternal age at registration, maternal education and family history of breast cancer

<sup>c</sup>Multivariable model adjusted for everything in <sup>b</sup> plus maternal pre-pregnancy BMI and prematurity

<sup>d</sup>Multivariable model includes everything in <sup>b</sup> plus prematurity

**Web Table 2. Multivariable models of birth size and growth in infancy and early childhood and benign breast disease diagnosis, Early Determinants of Mammographic Density (EDMD) Study, 1959-2008.**

|                                                                      | Model 1 <sup>a,b</sup> |            | Model 2 <sup>a,c</sup> |            | Model 3 <sup>a,d</sup> |            |
|----------------------------------------------------------------------|------------------------|------------|------------------------|------------|------------------------|------------|
|                                                                      | OR                     | 95% CI     | OR                     | 95% CI     | OR                     | 95% CI     |
| Birthweight (per 1 kg increase)                                      | 0.69                   | 0.46, 1.04 | 0.71                   | 0.46, 1.10 | 0.74                   | 0.47, 1.15 |
| Percentile rank change in weight, 0-4 months (per 10 unit increase)  | 0.98                   | 0.91, 1.05 | 0.99                   | 0.93, 1.07 | 0.99                   | 0.92, 1.07 |
| Percentile rank change in weight, 4-12 months (per 10 unit increase) | 1.09                   | 0.98, 1.21 | 1.11                   | 0.99, 1.23 | 1.10                   | 0.99, 1.23 |
| Percentile rank change in weight, 1-4 years (per 10 unit increase)   | 0.94                   | 0.86, 1.03 | 0.95                   | 0.86, 1.05 | 0.95                   | 0.85, 1.05 |
| Birthlength (per 1 cm increase)                                      | 1.04                   | 0.97, 1.12 | 1.05                   | 0.97, 1.15 | 1.05                   | 0.96, 1.14 |
| Percentile rank change in length, 0-4 months (per 10 unit increase)  | 1.02                   | 0.95, 1.09 | 1.01                   | 0.93, 1.08 | 1.00                   | 0.92, 1.08 |
| Percentile rank change in length, 4-12 months (per 10 unit increase) | 1.01                   | 0.93, 1.09 | 0.99                   | 0.91, 1.07 | 1.00                   | 0.91, 1.09 |
| Percentile rank change in length, 1-4 years (per 10 unit increase)   | 1.02                   | 0.92, 1.12 | 1.01                   | 0.91, 1.11 | 1.01                   | 0.90, 1.12 |

CI: confidence interval; cm: centimeters; kg: kilograms; OR: odds ratio

<sup>a</sup>Estimates are only adjusted for growth measures in the same or earlier time periods.

<sup>b</sup>Model 1 includes site, age at interview, birthweight, birthlength, changes in weight and height from 0-4 months, 4-12 months, and 1-4 years

<sup>c</sup>Model 2 includes all variables from Model 1 plus maternal age at registration, maternal pre-pregnancy BMI, maternal height, and maternal education

<sup>d</sup>Model 3 includes all variables from Model 1 plus maternal pre-pregnancy BMI, maternal height, maternal cigarettes per day, maternal weight gain during pregnancy and prematurity

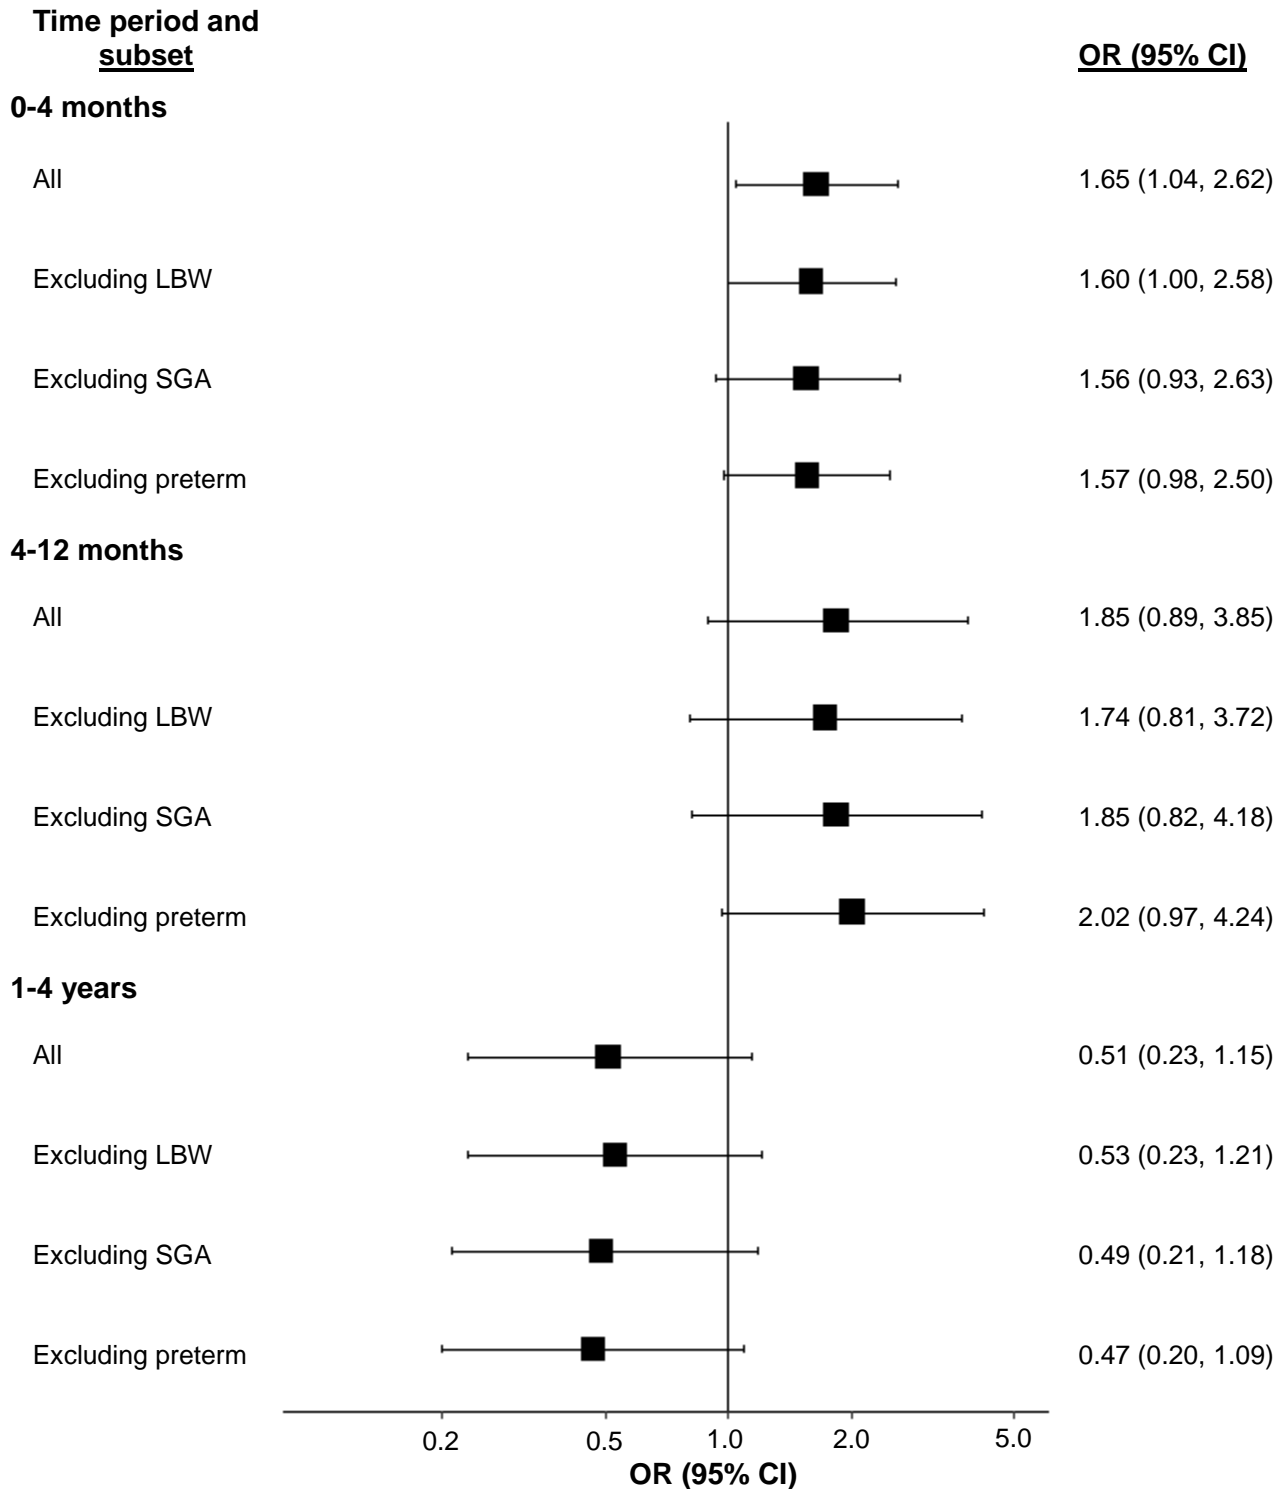

**Web Figure 1. Sensitivity analyses for the association between rapid weight gain and benign breast disease diagnosis, Early Determinants of Mammographic Density (EDMD) Study, 1959-2008.** CI: confidence interval; LBW: low birthweight (less than 2.5kg); SGA: small-for-gestational age (less than 10<sup>th</sup> percentile of within-cohort birthweight/gestational age); OR: odds ratio; preterm (less than 37 weeks). Rapid weight gain is defined as an increase of  $\geq 2$  major percentiles (5<sup>th</sup>, 10<sup>th</sup>, 25<sup>th</sup>, 50<sup>th</sup>, 75<sup>th</sup>, 95<sup>th</sup>). Referent group is stable weight gain, defined as staying within 2 major percentiles. Models adjusted for birthweight, birthlength, height gain pattern in the same time period, height and weight gain pattern of previous time periods, maternal pre-pregnancy BMI, maternal height, maternal cigarettes per day, maternal weight gain during pregnancy and prematurity\* (\*except for model excluding preterm)

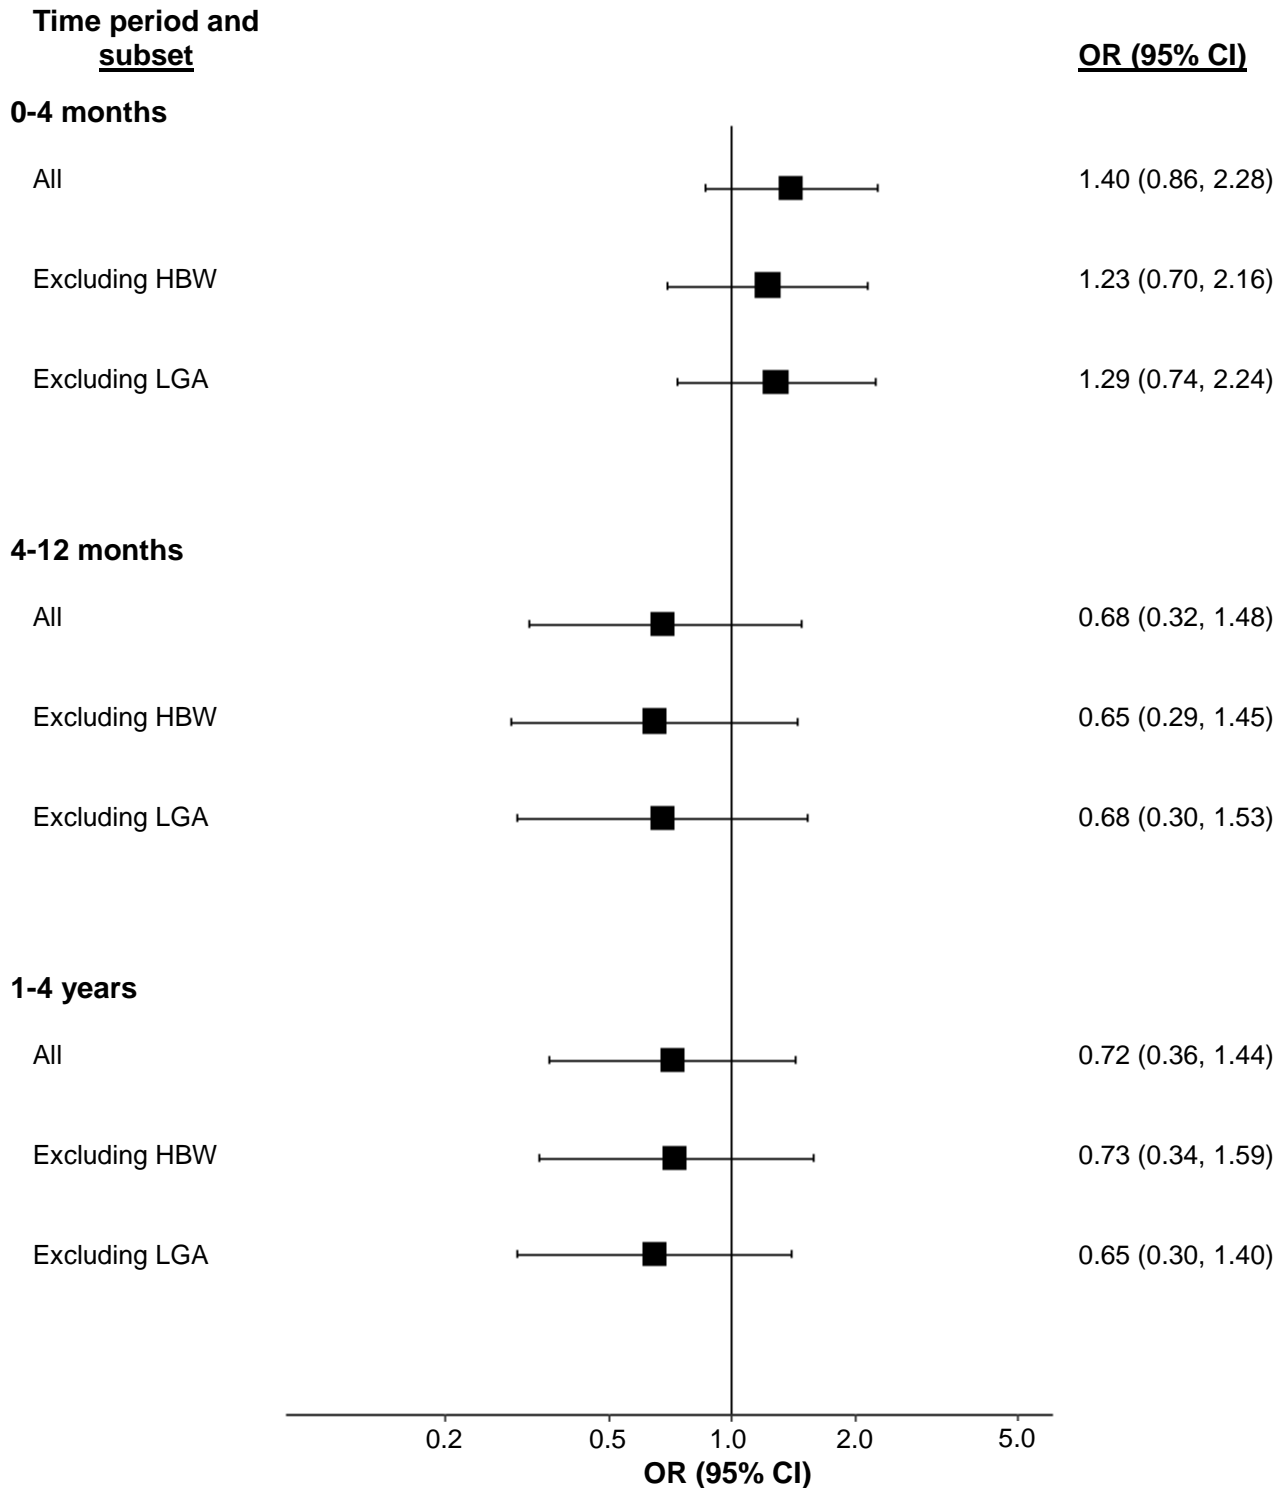

**Web Figure 2. Sensitivity analyses for the association between slow weight gain and benign breast disease diagnosis, Early Determinants of Mammographic Density (EDMD) Study, 1959-2008.** CI: confidence interval; HBW: high birthweight (more than 4 kg); LGA: large-for-gestational age (more than 90<sup>th</sup> percentile of within-cohort birthweight/gestational age); OR: odds ratio. Slow weight gain is defined as a decrease of  $\geq 2$  major percentiles (5<sup>th</sup>, 10<sup>th</sup>, 25<sup>th</sup>, 50<sup>th</sup>, 75<sup>th</sup>, 95<sup>th</sup>). Referent group is stable weight gain, defined as staying within 2 major percentiles. Models adjusted for birthweight, birthlength, height gain pattern in the same time period, height and weight gain pattern of previous time periods, maternal pre-pregnancy BMI, maternal height, maternal cigarettes per day, maternal weight gain during pregnancy and prematurity (model excluding preterm did not adjust for prematurity).

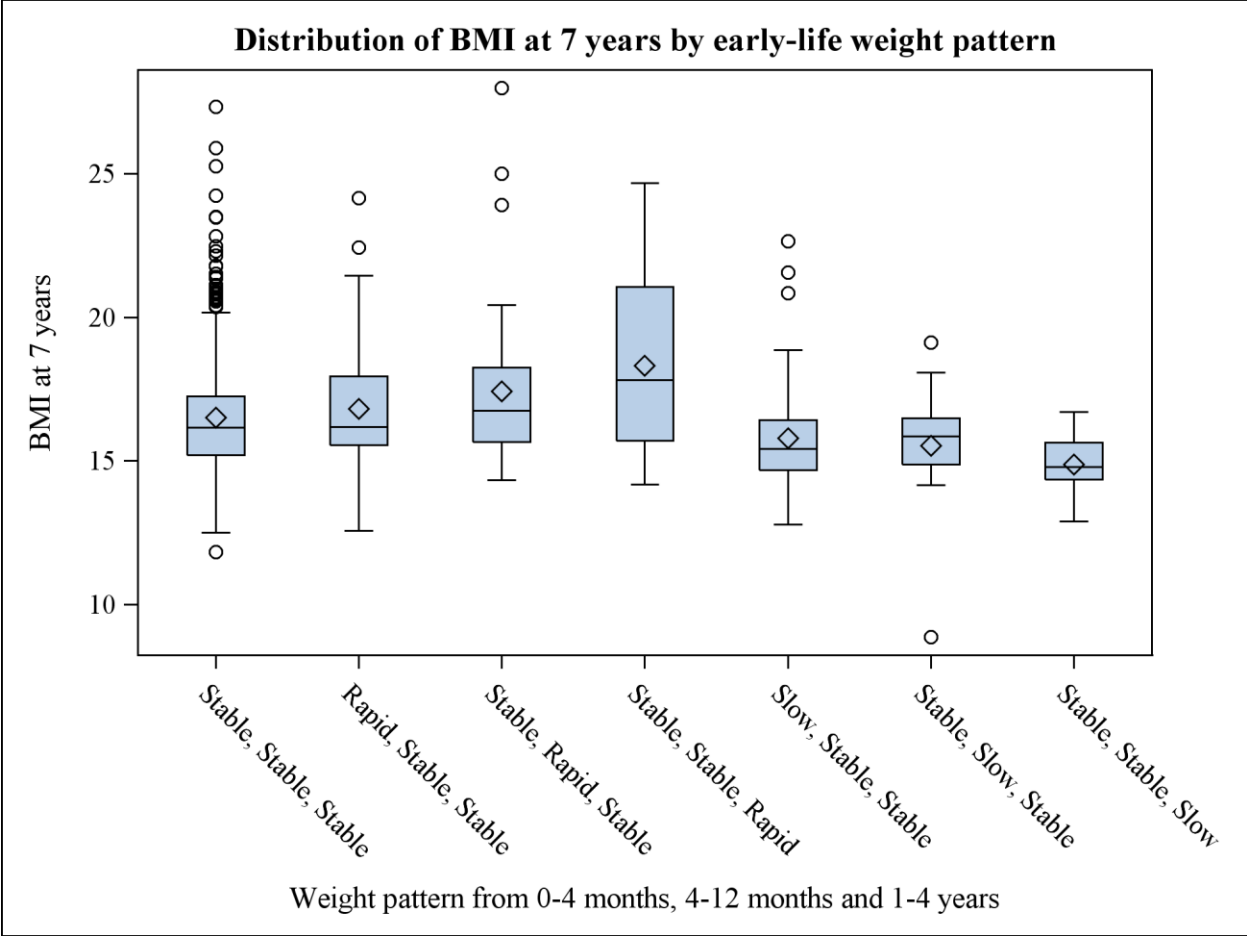

**Web Figure 3. Distribution of body mass index at age 7 years by early-life weight pattern, Early Determinants of Mammographic Density (EDMD) Study, 1959-2008.**
